# Supplementary material
Source: Copernicus journal article supplement (doi:10.5194/gmd-19-4271-2026)
Supplement: Supplementary file 1 [file gmd-19-4271-2026-supplement.pdf]

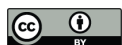

*Supplement of*

## **Implementation of the ORACLE (v1.0) organic aerosol composition and evolution module into the EC-Earth3-AerChem model**

**Stylios Kakavas et al.**

*Correspondence to:* Stelios Myriokefalitakis (steliosm@noa.gr) and Spyros N. Pandis (spyros@chemeng.upatras.gr)

The copyright of individual parts of the supplement might differ from the article licence.

**Table S1:** Global average surface concentrations of POA, SOA-sv, SOA-iv, and total OA from standalone TM5-MP simulation using the VBS configuration, presented for annual, DJF, MAM, JJA, and SON periods

| <b>OA</b>     | <b>Annual</b>                            | <b>DJF</b>                               | <b>MAM</b>                               | <b>JJA</b>                               | <b>SON</b>                               |
|---------------|------------------------------------------|------------------------------------------|------------------------------------------|------------------------------------------|------------------------------------------|
|               | <b>(<math>\mu\text{g m}^{-3}</math>)</b> |
| <b>TM5-MP</b> |                                          |                                          |                                          |                                          |                                          |
| POA           | 0.32                                     | 0.40                                     | 0.24                                     | 0.33                                     | 0.32                                     |
| SOA-sv        | 0.14                                     | 0.10                                     | 0.14                                     | 0.17                                     | 0.15                                     |
| SOA-iv        | 0.30                                     | 0.38                                     | 0.27                                     | 0.26                                     | 0.30                                     |
| Total OA      | 1.07                                     | 1.09                                     | 0.91                                     | 1.16                                     | 1.11                                     |

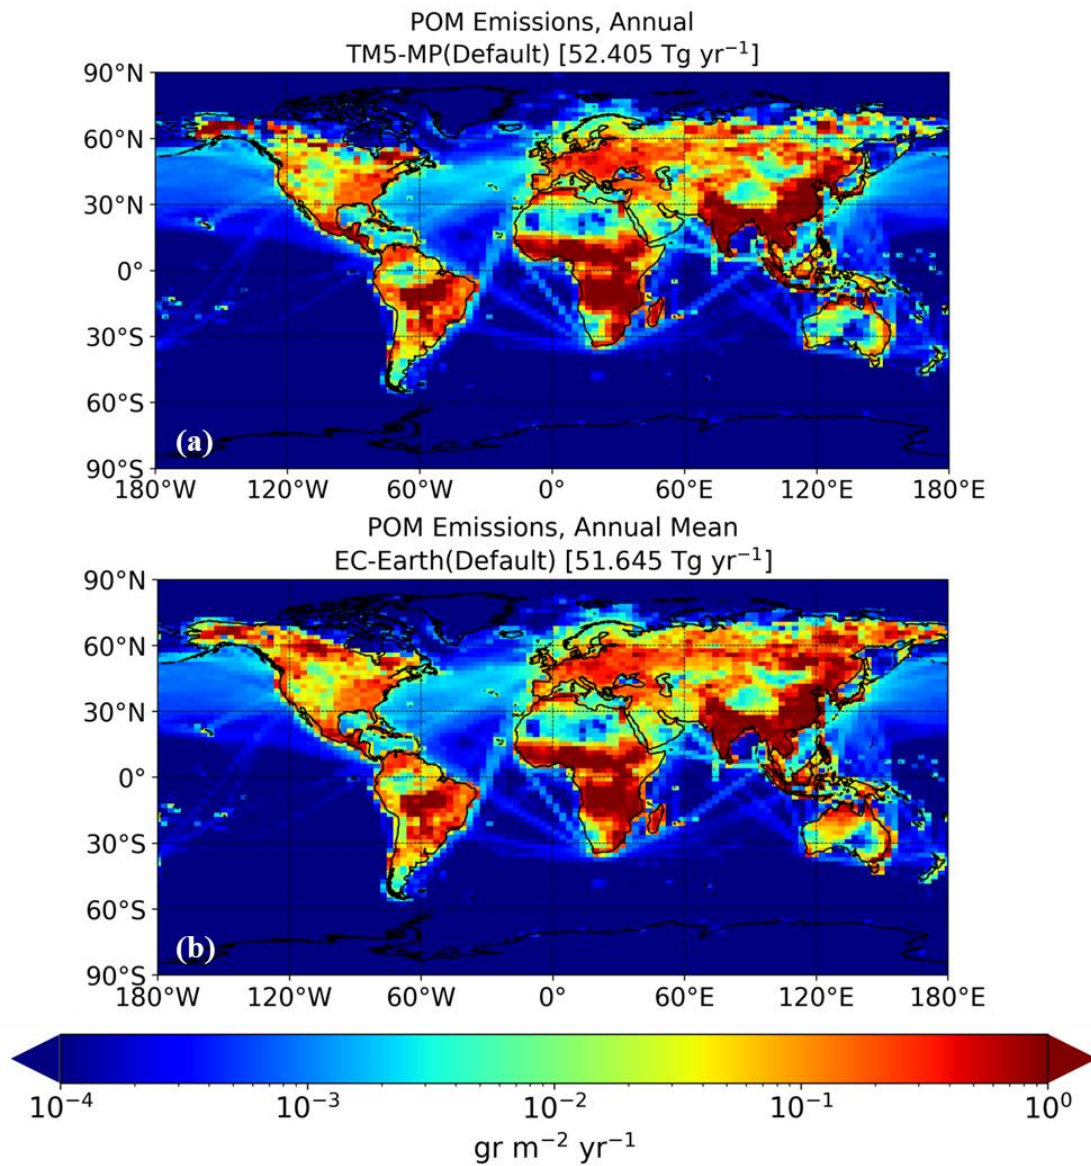

**Figure S1.** Annual POA emissions (in gr m<sup>-2</sup> yr<sup>-1</sup>) applied in the default simulation of: **(a)** standalone TM5-MP during 2005, and **(b)** EC-Earth during 2000-2010.

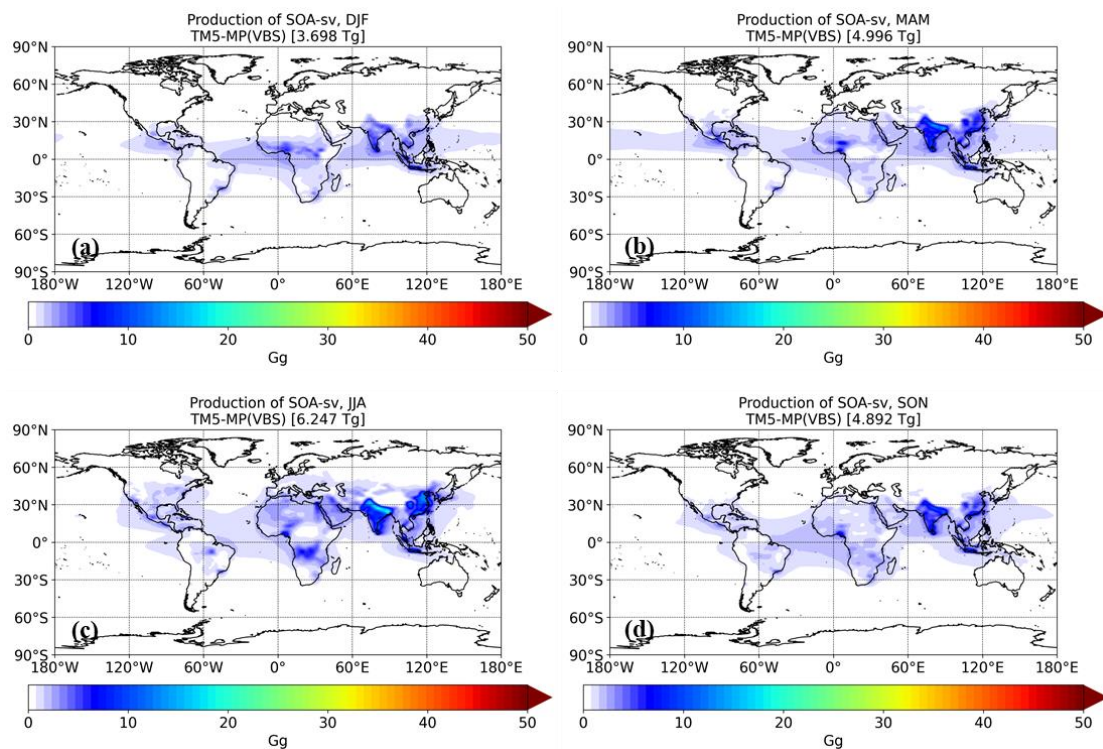

**Figure S2.** Production of SOA-sv as simulated using the VBS configuration in TM5-MP during 2005 (in Gg) for: (a) DJF, (b) MAM, (c) JJA, and (d) SON.

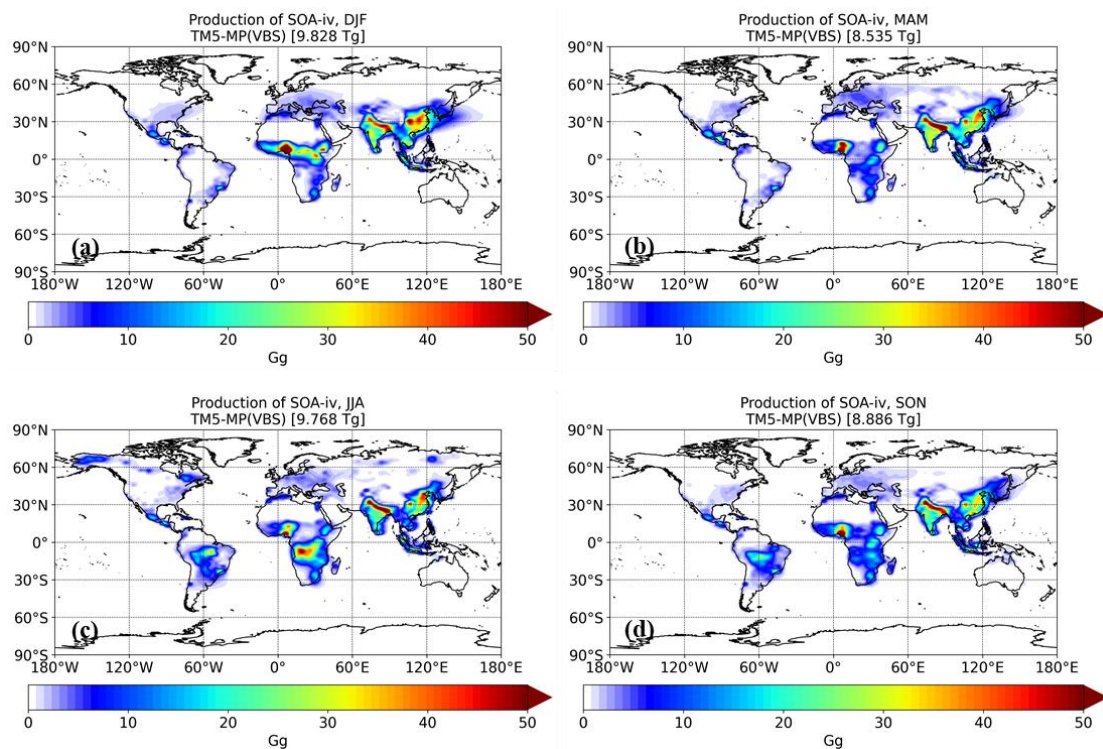

**Figure S3.** Production of SOA-iv as simulated using the VBS configuration in TM5-MP during 2005 (in Gg) for: **(a)** DJF, **(b)** MAM, **(c)** JJA, and **(d)** SON.

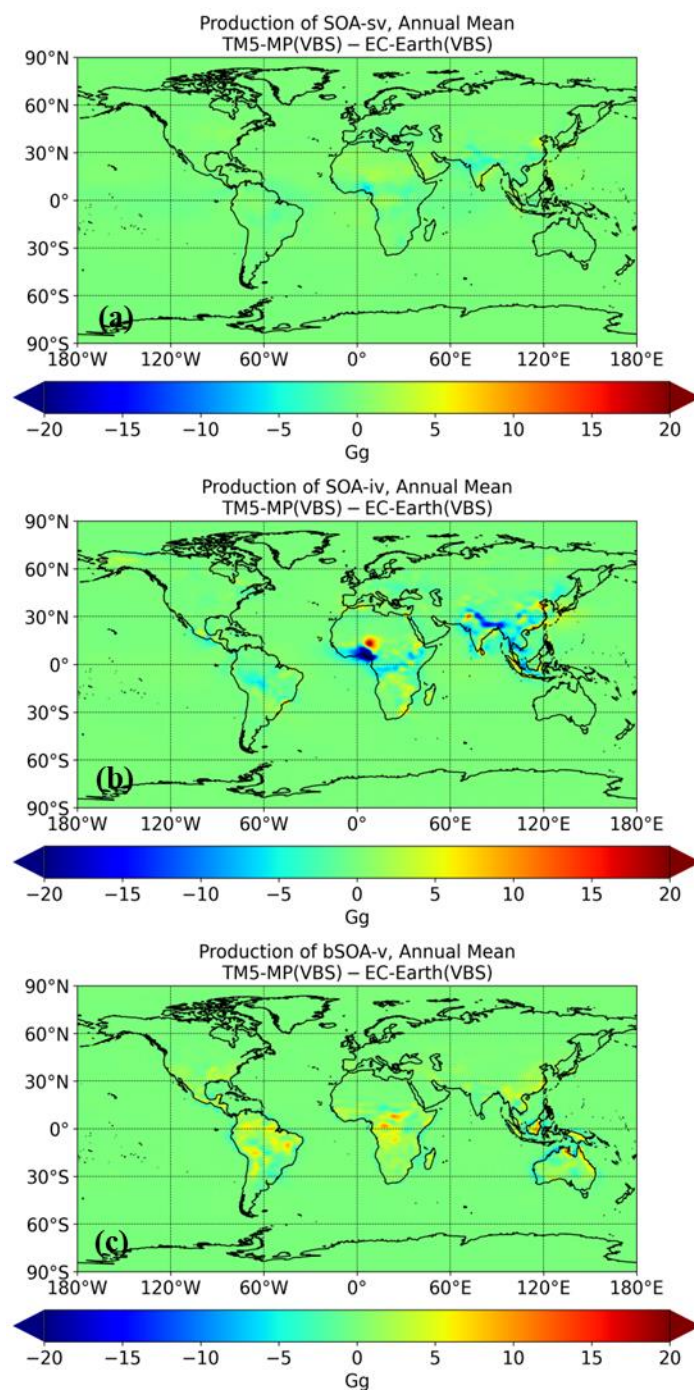

**Figure S4.** Annual mean differences in SOA production between TM5-MP and EC-Earth simulations during 2005 using the VBS configuration (in Gg) for: **(a)** SOA-sv, and **(b)** SOA-iv. For completeness, the difference in annual SOA production from biogenic VOCs (bSOA-v) in panel **(c)** is also shown. A positive change indicates that the standalone TM5-MP simulation predicts higher production than the EC-Earth.

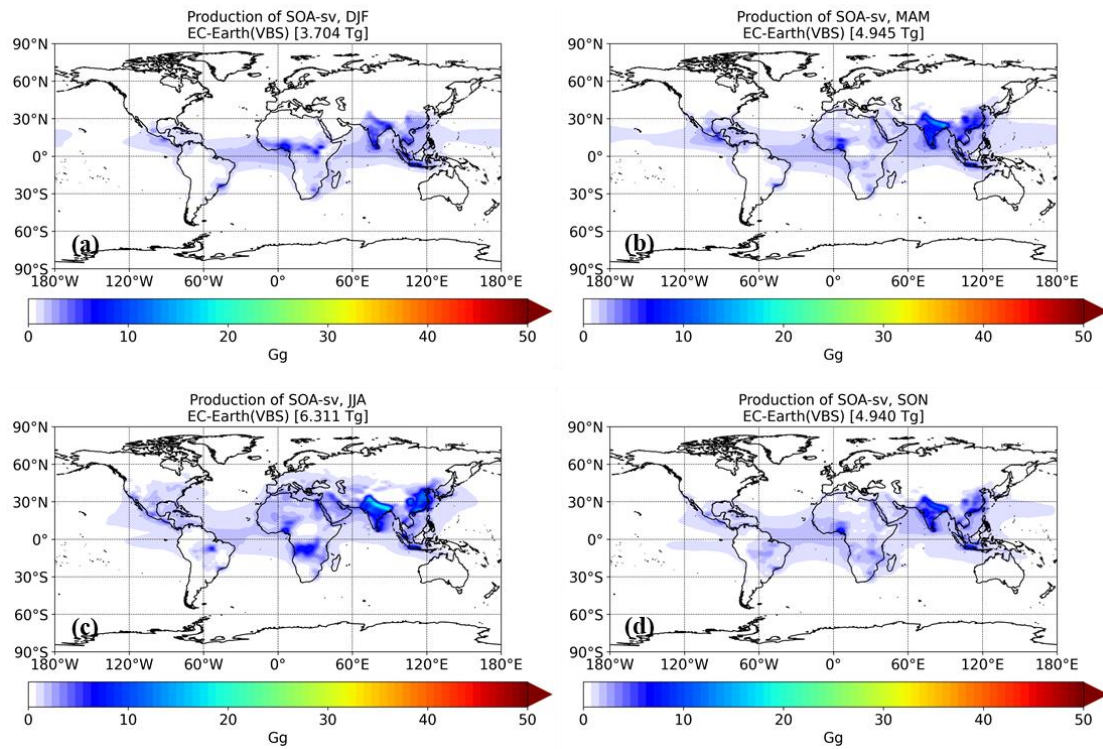

**Figure S5.** Production of SOA-sv as simulated using the VBS configuration of EC-Earth during 2005 (in Gg) for: (a) DJF, (b) MAM, (c) JJA, and (d) SON.

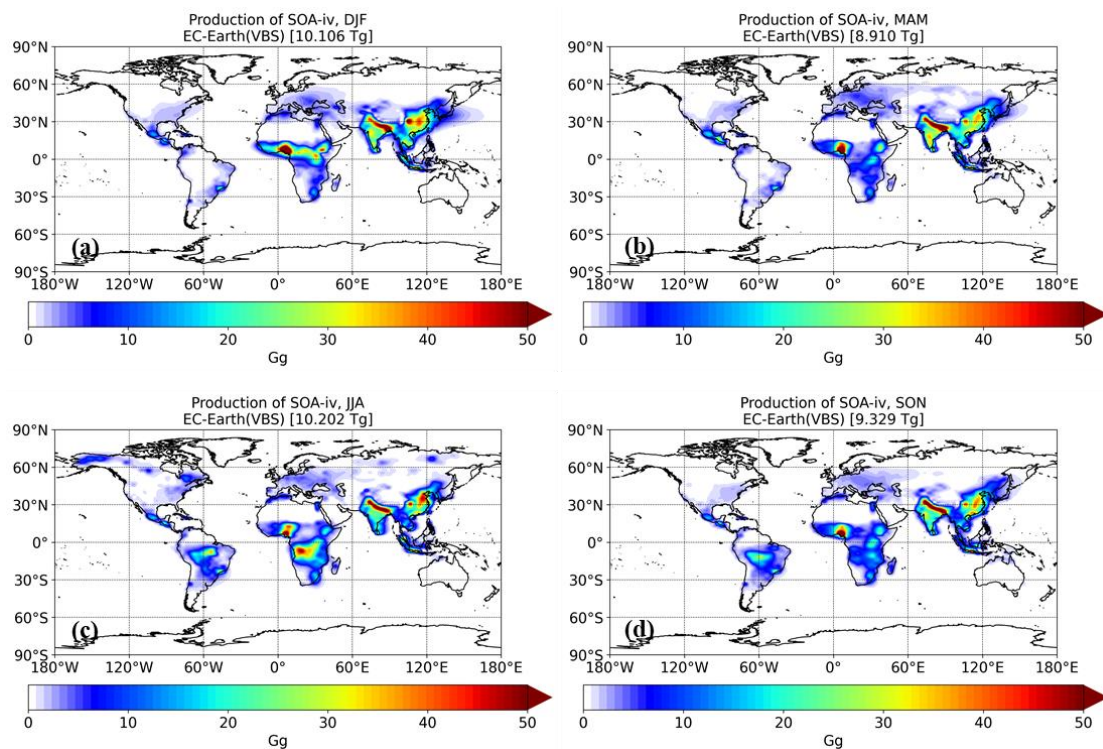

**Figure S6.** Production of SOA-iv as simulated using the VBS configuration of EC-Earth during 2005 (in Gg) for: (a) DJF, (b) MAM, (c) JJA, and (d) SON.

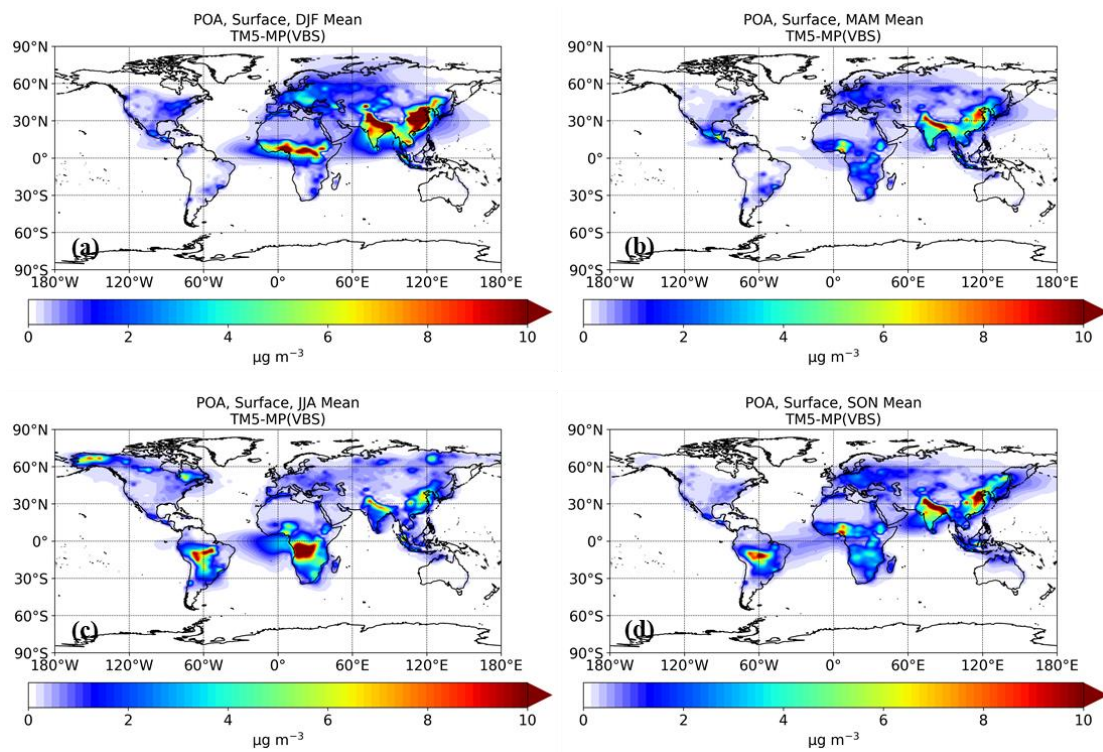

**Figure S7.** Mean surface concentrations of POA (in  $\mu\text{g m}^{-3}$ ) during: (a) DJF, (b) MAM, (c) JJA, and (d) SON simulated using the VBS configuration in TM5-MP.

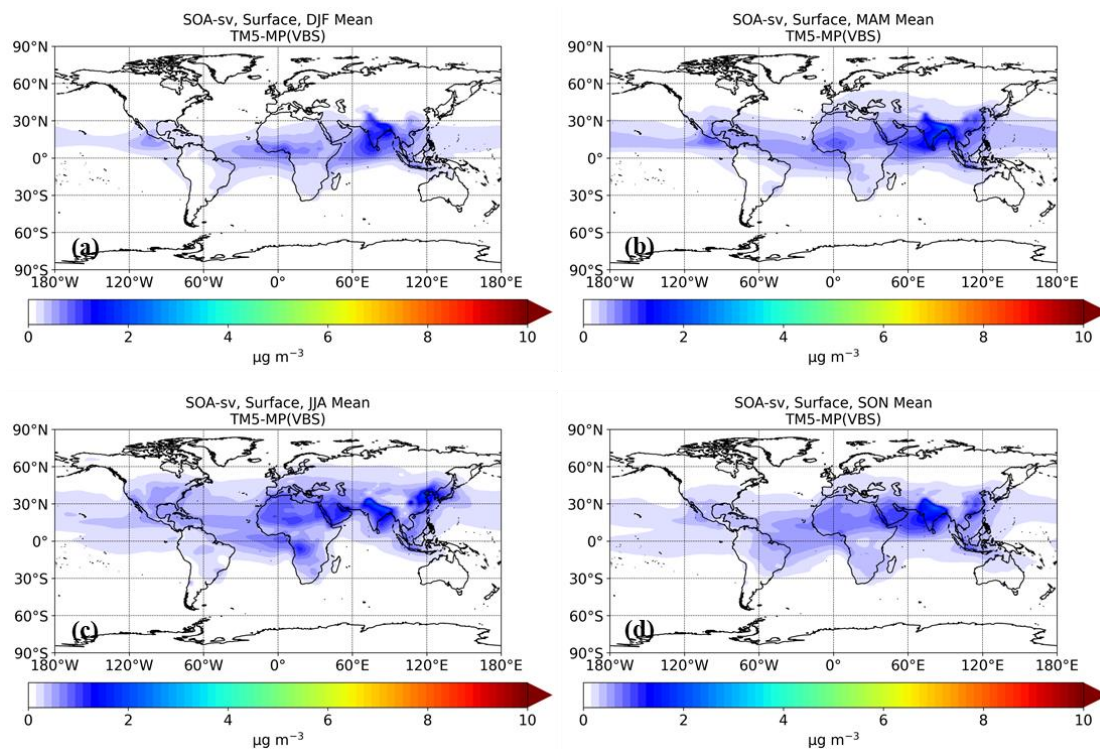

**Figure S8.** Mean surface concentrations of SOA-sv (in  $\mu\text{g m}^{-3}$ ) during: (a) DJF, (b) MAM, (c) JJA, and (d) SON simulated using the VBS configuration in TM5-MP.

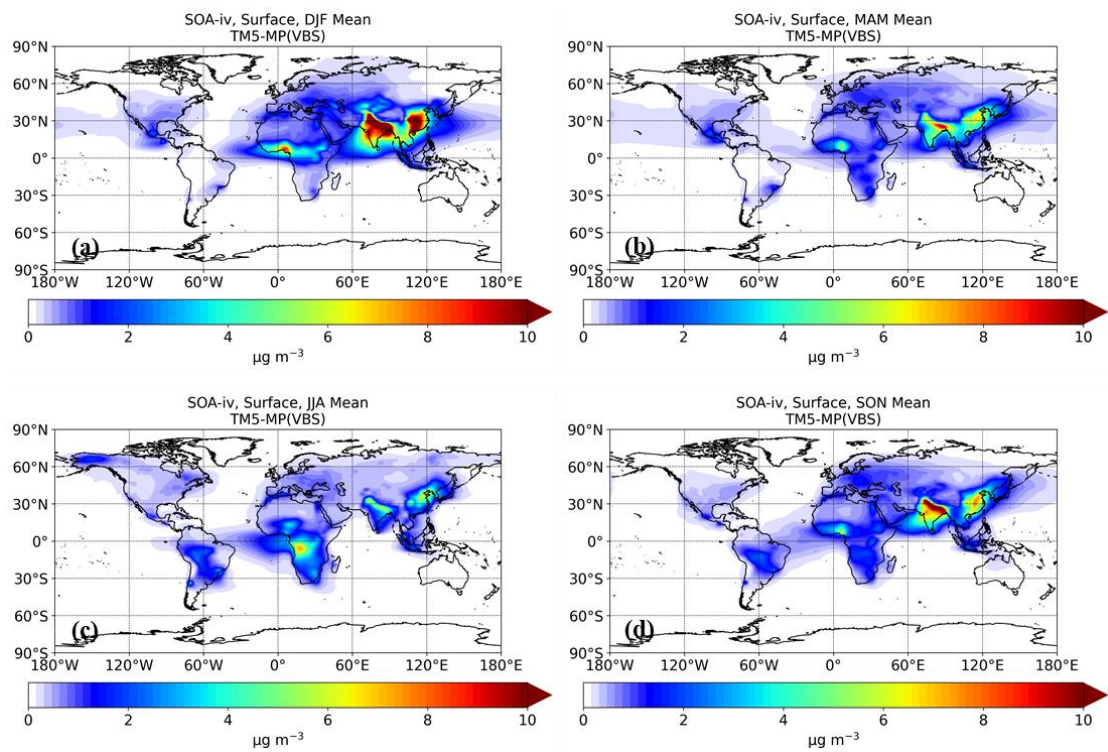

**Figure S9.** Mean surface concentrations of SOA-iv (in  $\mu\text{g m}^{-3}$ ) during: (a) DJF, (b) MAM, (c) JJA, and (d) SON simulated using the VBS configuration in TM5-MP.

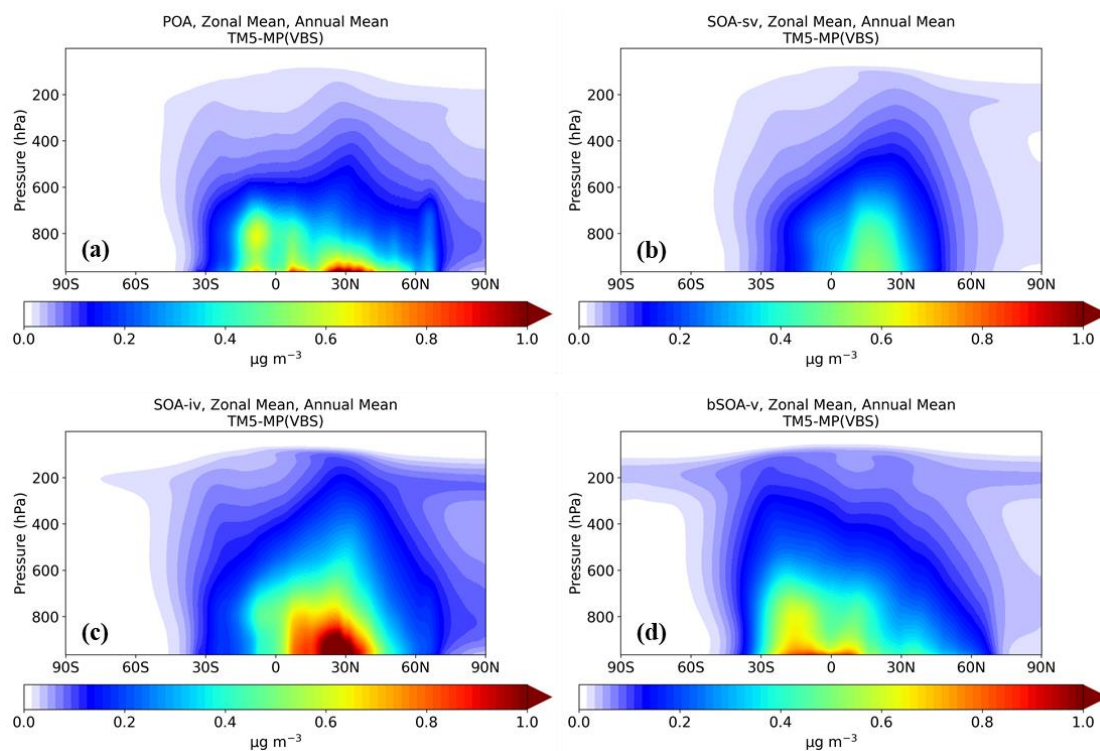

**Figure S10.** Annual mean zonal concentrations (in  $\mu\text{g m}^{-3}$ ) of: **(a)** POA, **(b)** SOA-sv, and **(c)** SOA-iv simulated using the VBS configuration in TM5-MP. For completeness, bSOA-v in panel **(d)** is also shown.

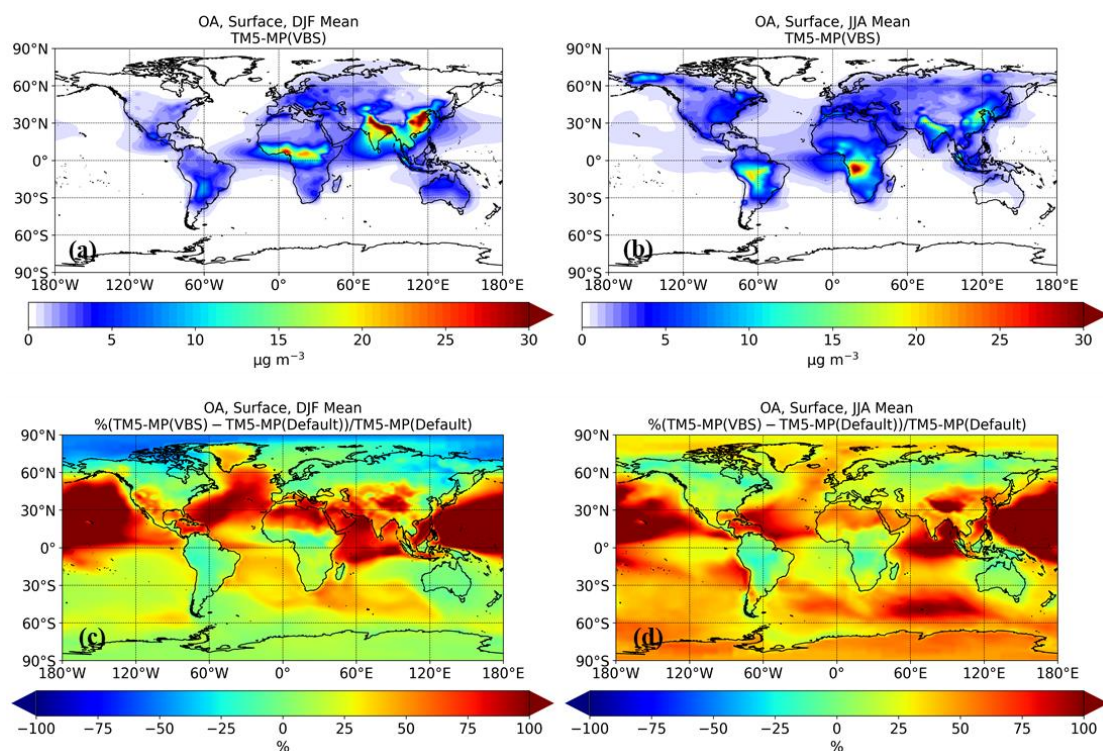

**Figure S11.** Mean concentrations of total organic aerosol (in  $\mu\text{g m}^{-3}$ ) during: **(a)** DJF, and **(b)** JJA, simulated using the VBS configuration in TM5-MP. Panels **(c)** and **(d)** show the corresponding relative differences (in %) compared to the previous (default) model configuration. A positive change indicates that the VBS configuration predicts more than the default one.

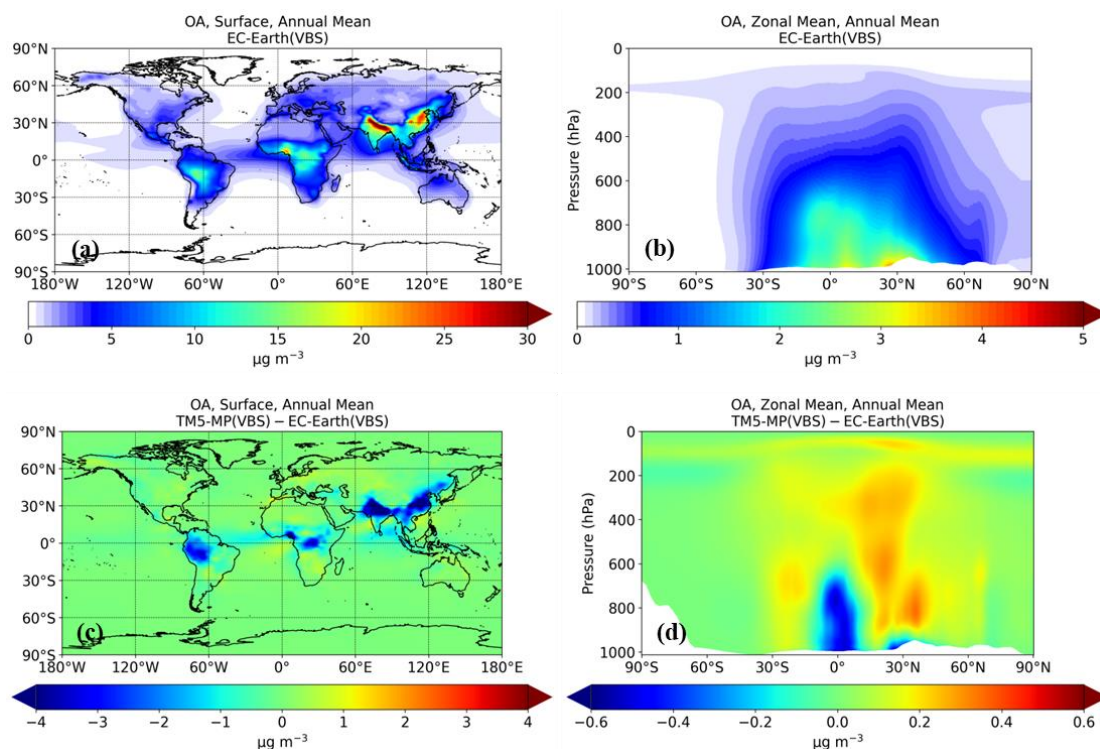

**Figure S12.** Annual mean concentrations of total organic aerosol (in  $\mu\text{g m}^{-3}$ ): **(a)** surface concentrations, and **(b)** zonal values as simulated using the VBS configuration of EC-Earth during 2005. Panels **(c)** and **(d)** show the corresponding differences (in  $\mu\text{g m}^{-3}$ ) compared to the TM5-MP predictions using the VBS configuration. A positive change indicates that the standalone TM5-MP simulation predicts higher concentrations than the EC-Earth.

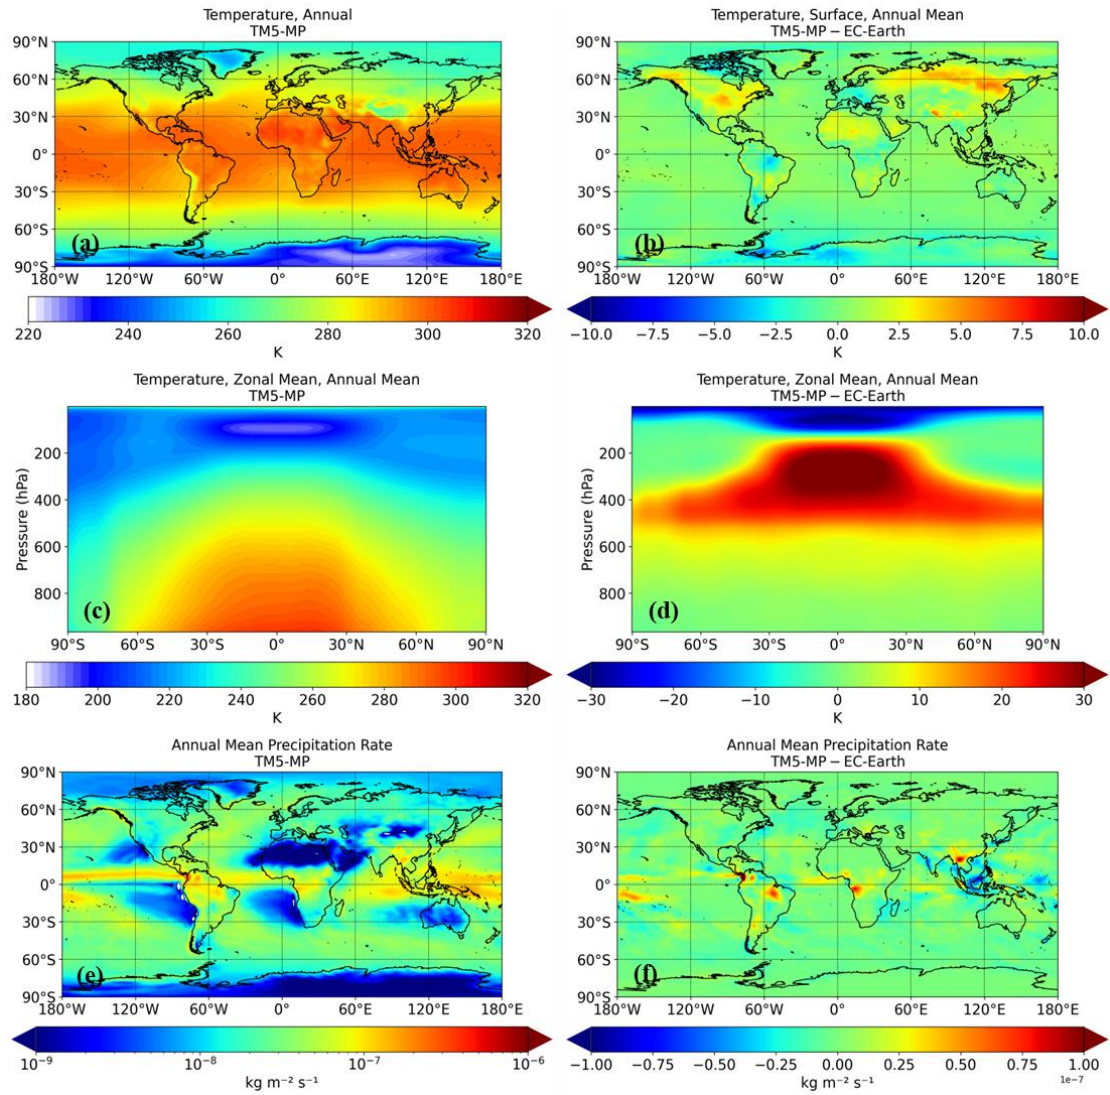

**Figure S13.** Meteorological fields from TM5-MP and their differences with EC-Earth for: (a), (b) annual mean surface temperature (in K), (c), (d) annual zonal-mean temperature (in K), and (e), (f) annual mean precipitation rate ( $\text{kg m}^{-2} \text{s}^{-1}$ ) for 2005. A positive change indicates that the standalone TM5-MP model accounts for higher values than the simulated of EC-Earth.
